# Supplementary material
Source: Springer Nature journal article supplement (https://www.springermedizin.de/resource/supplementary/12872_2013_681_MOESM4_ESM.pdf/9430654)

**A**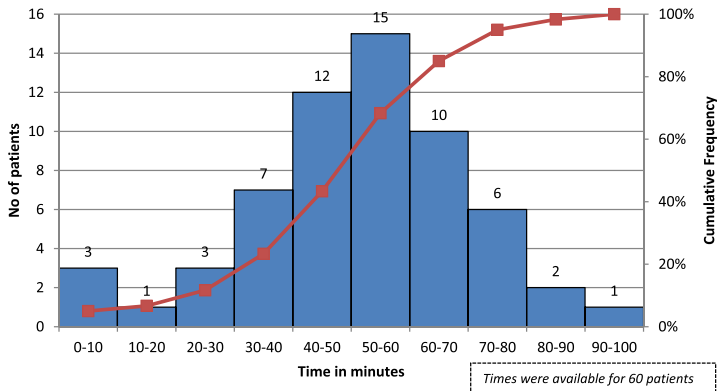**B**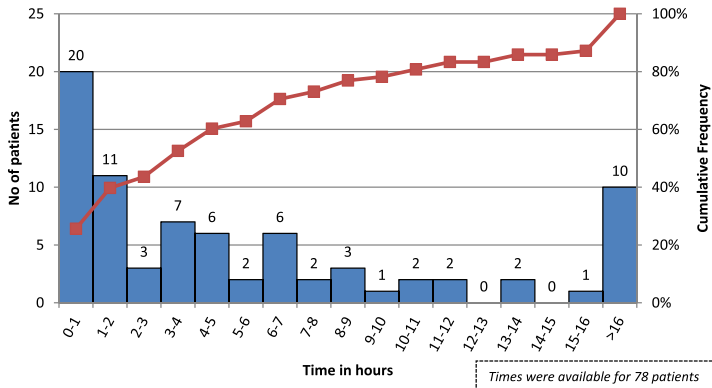

Supplement: MOESM4 [file 9430654]
